1 SARS-CoV-2 ORF6 disrupts nucleocytoplasmic transport through interactions with  
2 Rae1 and Nup98

3

4 Amin Addetia<sup>1</sup>, Nicole A. P. Lieberman<sup>1</sup>, Quynh Phung<sup>1</sup>, Hong Xie<sup>1</sup>, Pavitra  
5 Roychoudhury<sup>1,2</sup>, Lasata Shrestha<sup>1</sup>, Michelle Loprieno<sup>1</sup>, Meei-Li Huang<sup>1</sup>, Keith R.  
6 Jerome<sup>1,2</sup>, Alexander L. Greninger<sup>1,2#</sup>

7

8 <sup>1</sup>Department of Laboratory Medicine and Pathology, University of Washington, Seattle,  
9 Washington, USA

10 <sup>2</sup>Vaccine and Infectious Disease Division, Fred Hutchinson Cancer Research Center,  
11 Seattle, Washington, USA

12

13

14

15 **Running title:** SARS-CoV-2 ORF6 disrupts mRNA nuclear export

16 #Address correspondence to Alexander L. Greninger, [agrening@uw.edu](mailto:agrening@uw.edu)

17 **Abstract**

18 RNA viruses that replicate in the cytoplasm often disrupt nucleocytoplasmic transport to  
19 preferentially translate their own transcripts and prevent host antiviral responses. The  
20 *Sarbecovirus* accessory protein ORF6 has previously been shown to be the major  
21 inhibitor of interferon production in both SARS-CoV and SARS-CoV-2. SARS-CoV-2  
22 ORF6 was recently shown to co-purify with the host mRNA export factors Rae1 and  
23 Nup98. Here, we demonstrate SARS-CoV-2 ORF6 strongly represses protein  
24 expression of co-transfected reporter constructs and imprisons host mRNA in the  
25 nucleus, which is associated with its ability to co-purify with Rae1 and Nup98. These  
26 protein-protein interactions map to the C-terminus of ORF6 and can be abolished by a  
27 single amino acid mutation in Met58. Overexpression of Rae1 restores reporter  
28 expression in the presence of SARS-CoV-2 ORF6. We further identify an ORF6 mutant  
29 containing a 9-amino acid deletion, ORF6  $\Delta$ 22-30, in multiple SARS-CoV-2 clinical  
30 isolates that can still downregulate the expression of a co-transfected reporter and  
31 interact with Rae1 and Nup98. SARS-CoV ORF6 also interacts with Rae1 and Nup98.  
32 However, SARS-CoV-2 ORF6 more strongly co-purifies with Rae1 and Nup98 and  
33 results in significantly reduced expression of reporter proteins compared to SARS-CoV  
34 ORF6, a potential mechanism for the delayed symptom onset and pre-symptomatic  
35 transmission uniquely associated with the SARS-CoV-2 pandemic.

36

37 **Importance**

38 SARS-CoV-2, the causative agent of COVID-19, is an RNA virus with a large genome  
39 that encodes accessory proteins. While these accessory proteins are not required for

40 growth *in vitro*, they can contribute to the pathogenicity of the virus. One of SARS-CoV-  
41 2's accessory proteins, ORF6, was recently shown to co-purify with two host proteins,  
42 Rae1 and Nup98, involved in mRNA nuclear export. We demonstrate SARS-CoV-2  
43 ORF6 interaction with these proteins is associated with reduced expression of a  
44 reporter protein and accumulation of poly-A mRNA within the nucleus. SARS-CoV  
45 ORF6 also shows the same interactions with Rae1 and Nup98. However, SARS-CoV-2  
46 ORF6 more strongly represses reporter expression and co-purifies with Rae1 and  
47 Nup98 compared to SARS-CoV ORF6. The ability of SARS-CoV-2 ORF6 to more  
48 strongly disrupt nucleocytoplasmic transport than SARS-CoV ORF6 may partially  
49 explain critical differences in clinical presentation between the two viruses.

## 50 **Introduction**

51 Control over host protein expression allows viruses to suppress the host's  
52 immune response and hijack the host's translational machinery for expression of viral  
53 proteins (1–3). Numerous viruses exert translational control by encoding proteins which  
54 target nucleocytoplasmic transport, including the nuclear export of host mRNA (4, 5).  
55 The host proteins involved in nucleocytoplasmic transport are targets of multiple viruses  
56 including vesicular stomatitis virus (VSV), poliovirus, and Kaposi's sarcoma-associated  
57 herpesvirus (KSHV) (6–8).

58 Nup98 is a component of the nuclear pore complex and interacts with the RNA  
59 export factor Rae1 to bind single stranded RNA and facilitate the translocation of mRNA  
60 through the nuclear pore complex (9, 10). The matrix (M) protein of VSV interacts with  
61 the Rae1•Nup98 complex at the nucleic acid binding site to prevent single stranded  
62 RNA from binding Rae1•Nup98 (6, 11). As a result, mRNA remains trapped within the  
63 nucleus and global gene expression within host cells is significantly reduced (6). A  
64 single methionine residue surrounded by acidic residues within VSV M is critical for  
65 interactions with Rae1 and mutations at this residue impair VSV M's ability to block  
66 mRNA nuclear export (11, 12). ORF10 of KSHV also interacts with Rae1•Nup98 to  
67 reduce nuclear export of specific mRNA transcripts (8). Similar to VSV M, ORF10 of  
68 KSHV contains a conserved methionine residue surrounded by acidic residues which is  
69 likely the interacting motif for the Rae1•Nup98 complex (13).

70 Severe acute respiratory syndrome coronavirus 2 (SARS-CoV-2), the causative  
71 agent of Coronavirus Disease 2019 (COVID-19), is a single stranded RNA virus  
72 belonging to the *Betacoronavirus* genus (14). With their large genomes, coronaviruses



73 including SARS-CoV-2 encode accessory proteins that are not required for viral  
74 replication, but can contribute the virus's pathogenicity (15). One of SARS-CoV-2's  
75 accessory proteins, ORF6, was recently shown to co-purify with Rae1 and Nup98 in an  
76 affinity purification mass spectrometry screen (13). Similar to VSV M and KSHV ORF10,  
77 SARS-CoV-2 ORF6 contains a methionine in its C-terminus that is surrounded by acidic  
78 residues, which may facilitate an interaction with the nucleic binding site of the  
79 Rae1•Nup98 complex (13). The impact of the putative ORF6-Rae1-Nup98 interactions  
80 on export of host mRNA and protein expression has yet to be determined.

81 In the closely related severe acute respiratory syndrome coronavirus (SARS-  
82 CoV), ORF6 was shown to block nuclear import of STAT1 by binding the importin  
83 karyopherin alpha 2 (16). SARS-CoV ORF6 has also been shown to downregulate  
84 expression of co-transfected constructs (17). However, it is unclear if SARS-CoV ORF6  
85 mediates this repression by restricting mRNA nuclear export via interactions with Rae1  
86 or Nup98.

87

## 88 **Results**

89 *Identification of a 9 amino acid deletion in ORF6 independently arising in multiple*  
90 *clinical SARS-CoV-2 isolates and a serially passaged cultured isolate*

91 While sequencing clinical SARS-CoV-2 isolates, we identified a unique isolate (WA-UW-  
92 4752, MT798143) containing a 27-nucleotide, in-frame deletion within ORF6. The  
93 isolate was derived from a nasopharyngeal swab (C<sub>T</sub> 26.1, Hologic Panther Fusion)  
94 from an individual who presented to the emergency room after 8 days of fever, cough,  
95 and myalgias and was on no specific COVID-19 therapy. The resulting ORF6 protein,

96 referred to as ORF6  $\Delta$ 22-30, contains a 9-amino acid deletion towards the N-terminus of  
97 ORF6 (Figure 1A). The deletion was confirmed by RT-PCR and Sanger sequencing  
98 (Figure 1B).

99 We searched for similar ORF6 deletions in over 67,000 SARS-CoV-2 genomes  
100 present in GISAID (accessed July 17, 2020) and identified 6 other clinical isolates  
101 collected in Virginia, California, Belgium, and the United Kingdom that contained the  
102 same ORF6 deletion (Table S1). Additionally, we identified a SARS-CoV-2 isolate with  
103 an identical deletion that arose after six serial passages in cell culture (Table S1) (18).  
104 Notably, the original clinical isolate used to infect the cells had an intact ORF6 (18). We  
105 next performed a phylogenetic analysis (Figure 1C) to determine the genetic  
106 relatedness of the 8 strains. The strains differed by 2 – 20 single nucleotide variants and  
107 belonged to 4 different lineages, A, A.1, B.1, and B.1.5, as defined by Pangolin  
108 (<https://github.com/cov-lineages/pangolin>) (19), suggesting the ORF6  $\Delta$ 22-30 deletion  
109 arose independently in multiple lineages.

110

#### 111 *ORF6 downregulates expression of a co-transfected mCherry reporter*

112 ORF6 putatively interacts with the nuclear export factor Rae1 and the nuclear pore  
113 complex component Nup98 (13). VSV M and KSHV ORF10, which both interact with  
114 Rae1 and Nup98, downregulate expression of fluorescent or luminescent reporters  
115 when co-transfected in cell culture by preventing nuclear export of reporter mRNA (6,  
116 8). We generated a series of N-terminal GFP-tagged ORF6 constructs (Figure 2A) and  
117 co-transfected 293T cells with these constructs and a reporter plasmid encoding  
118 mCherry. Similar to VSV M, cells expressing the GFP-ORF6 construct showed a

119 significant reduction in mCherry expression (Mean Fluorescent Intensity [MFI]: 0.31;  
120 Standard Error [SE]: 0.01;  $p = 0.01$ ) relative to the cells transfected with GFP alone  
121 (MFI: 1.0; SE: 0.09) (Figure 2B-C). Subsequent western blotting and densitometry  
122 (Figure 2D-E) further confirmed mCherry expression was downregulated in cells  
123 expressing wild-type (WT) ORF6.

124 ORF6 constructs containing deletions in the protein's N-terminus, ORF6  $\Delta$ 1-16  
125 (MFI: 0.23, SE: 0.03) and the clinical isolate variant ORF6  $\Delta$ 22-30 (MFI: 0.31; SE: 0.01),  
126 displayed a 3- to 4-fold reduction in mCherry expression (Figure 2B-C) similar to WT  
127 ORF6, indicating the N-terminus of ORF6 is not involved in downregulating protein  
128 expression. In contrast, mCherry expression was only reduced 1.4- to 1.5-fold in the  
129 presence of ORF6 constructs with deletions in the C-terminus, ORF6  $\Delta$ 38-61 (MFI:  
130 0.71; SE: 0.08) and  $\Delta$ 50-61 (MFI: 0.66; SE: 0.03) (Figure 2B-C).

131 In VSV M, a motif consisting of a methionine residue surrounded by acidic  
132 residues is critical for reducing expression levels of co-transfected reporters. The  
133 methionine residue within the motif is conserved between VSV M and KSHV ORF10  
134 and a similar motif with a methionine residue is present in the SARS-CoV-2 ORF6 C-  
135 terminus (Figure 1A). We substituted this methionine residue in ORF6 to an alanine,  
136 generating the construct ORF6 Met58Ala (Figure 2A). Transfection of ORF6 Met58Ala  
137 did not downregulate mCherry expression (MFI: 1.08; SE: 0.09) (Figure 2B-C)  
138 suggesting Met58 is critical for the function of ORF6.

139

140 *mRNA accumulates in the nucleus in the presence of ORF6*

141 We next investigated whether the reduced mCherry expression observed in the  
142 presence of ORF6 was due to the impairment of mRNA nuclear export. We transfected  
143 cells with either GFP, GFP-tagged WT ORF6, GFP-tagged ORF6 Met58Ala, or GFP-  
144 tagged VSV M and stained the cells with an oligo dT(30) fluorescent probe to visualize  
145 mRNA distribution within the transfected cells (Figure 3). In cells transfected with GFP  
146 or ORF6 Met58Ala, mRNA was distributed throughout the cell indistinguishable from the  
147 mRNA localization pattern in un-transfected cells. In contrast, mRNA in cells expressing  
148 WT ORF6 and VSV M was present in multiple foci within the nucleus suggesting the  
149 mRNA in these cells was accumulating in the nucleus. The mRNA localization patterns  
150 are consistent with the reporter expression (Figure 2B-D) indicating that the  
151 downregulation in reporter expression is due to impairment of mRNA nuclear export.

152

### 153 *The C-terminus of SARS-CoV-2 ORF6 interacts with Rae1 and Nup98*

154 In VSV M and KSHV ORF10, downregulation of co-transfected fluorescent and  
155 luminescent reporters and impairment of mRNA nuclear export occurs due to  
156 interactions with the nuclear mRNA export factor Rae1 and nuclear pore complex  
157 component Nup98 (6, 8). VSV M displaces single stranded RNA in the Rae1•Nup98  
158 complex to prevent nuclear export of host mRNA (11). We hypothesized the inability of  
159 the ORF6 C-terminal deletions to downregulate mCherry expression in a similar manner  
160 as WT ORF6 (Figure 2B-E) was attributed to the loss of the interaction between these  
161 ORF6 constructs and Rae1 and Nup98. We transfected 293T cells with GFP-tagged  
162 ORF6 constructs (Figure 2A) and rapidly affinity purified the GFP-tagged proteins.  
163 Western blotting on the elutes confirmed WT ORF6, along with ORF6 constructs with N-

164 terminal deletions, interacts with Rae1 and Nup98 (Figure 4). The C-terminal deletion  
165 constructs, ORF6  $\Delta$ 38-61 and ORF6  $\Delta$ 50-61, did not pull down Rae1 or Nup98 (Figure  
166 4). These data suggest the C-terminus of ORF6 interacts with Rae1 and Nup98, while  
167 the N-terminus is not essential for the observed interactions. This is consistent with the  
168 observation that C-terminal deletion mutants of ORF6 did not dramatically reduce  
169 expression of the mCherry reporter (Figure 2B-E).

170 The methionine residue in the Rae1-Nup98 interacting motif of VSV M forms  
171 multiple intermolecular interactions with amino acid residues in the nucleic acid binding  
172 site of Rae1 and facilitates the interaction between VSV M and the Rae1•Nup98  
173 complex (11). We hypothesized Met58 of SARS-CoV-2 ORF6 is similarly responsible  
174 for interactions with Rae1 and Nup98. Affinity purification of ORF6 Met58Ala revealed it  
175 does not interact with Rae1 or Nup98 (Figure 4), confirming the importance of Met58 in  
176 the ORF6-Rae1 and ORF6-Nup98 interactions.

177

178 *Overexpression of Rae1 restores mCherry reporter expression in cells transfected with*  
179 *ORF6*

180 We next investigated whether we could restore mCherry expression in 293T cells  
181 transfected with ORF6 by overexpressing Rae1. Rae1 overexpression restored  
182 mCherry expression in a dose-dependent manner (Figure 5A-B). Subsequent western  
183 blotting and densitometry confirmed this Rae1 dose-dependent rescue of mCherry  
184 expression (Figure 5C-D). These data indicate ORF6's interaction with Rae1 is  
185 responsible for downregulating mCherry reporter expression in cell culture.

186

187 *SARS-CoV-2 ORF6 more strongly co-purifies with Rae1 and Nup98 compared to*  
188 *SARS-CoV ORF6*

189 We next compared the relative ability of SARS-CoV ORF6 and SARS-CoV-2 ORF6 to  
190 downregulate reporter expression. SARS-CoV ORF6 and SARS-CoV-2 ORF6 share  
191 69% identity by amino acid, including the same methionine residue surrounded by  
192 acidic residues (Figure 6A). SARS-CoV ORF6 has been shown to downregulate  
193 expression of a co-transfected construct in a dose-dependent manner (19), suggesting  
194 its C-terminus may also interact with the Rae1•Nup98 complex.

195 We co-transfected 293T cells with GFP-tagged SARS-CoV ORF6 or GFP-tagged  
196 SARS-CoV-2 ORF6 and mCherry to assess the impact of these constructs on protein  
197 expression. Compared to cells transfected with GFP alone, cells transfected with SARS-  
198 CoV ORF6 displayed reduced mCherry expression (MFI: 1; SE: 0.08 vs. MFI: 0.71, SE:  
199 0.03), however this difference was not significant ( $p = 0.06$ ) (Figure 6B-C). Cells  
200 transfected with SARS-CoV-2 ORF6 displayed a significant reduction in mCherry  
201 expression compared to cells transfected with SARS-CoV ORF6 (MFI: 0.3; SE: 0.02;  $p$   
202 = 0.001) (Figure 6B-C). Western blotting also demonstrated decreased expression of  
203 SARS-CoV-2 ORF6 relative to SARS-CoV ORF6, suggesting expression levels do not  
204 explain the differential effects on reporter gene expression (Figure 6D).

205 We hypothesized the differences in mCherry expression between SARS-CoV  
206 ORF6 and SARS-CoV-2 ORF6 could be attributed to differences in co-purification of  
207 Rae1 and Nup98. We transfected 293T cells with the GFP-tagged constructs and  
208 affinity purified the tagged-proteins. Western blotting revealed SARS-CoV ORF6  
209 interacts with Rae1 and Nup98 similar to SARS-CoV-2 ORF6 (Figure 6E). Densitometry

210 on the ratio of prey-to-bait demonstrated SARS-CoV-2 ORF6 co-purified with 1.3-fold  
211 more Rae1 (Figure 6F) and 3.8-fold more Nup98 (Figure 6G) compared to SARS-CoV  
212 ORF6. These data suggest SARS-CoV-2 ORF6 may more dramatically repress protein  
213 expression via a stronger interaction with the Rae1•Nup98 complex compared to SARS-  
214 CoV ORF6.

215

## 216 **Discussion**

217 Here, we demonstrate SARS-CoV-2 ORF6 downregulates protein expression and  
218 entraps mRNA in the nucleus through interactions with the mRNA nuclear export factor  
219 Rae1 and the nuclear pore complex component Nup98. We show reporter repression,  
220 mRNA nuclear export, and the host-viral protein-protein interactions are critically  
221 dependent on a methionine residue in the ORF6 C-terminus. Additionally, we  
222 demonstrate an ORF6 allele with a 9-amino acid deletion which has arisen in multiple  
223 clinical SARS-CoV-2 isolates and a serially passaged culture isolate maintains the  
224 ability to downregulate expression of co-transfected reporter and interact with Rae1 and  
225 Nup98. Finally, we found that SARS-CoV-2 ORF6 more strongly represses reporter  
226 expression and more strongly copurifies with Rae1-Nup98 compared to SARS-CoV  
227 ORF6.

228 RNA viruses, including coronaviruses, that replicate in the cytoplasm have  
229 mechanisms to suppress cellular translation, which allows these viruses use the host's  
230 translational machinery to preferentially express viral proteins (1–3). In SARS-CoV,  
231 ORF6 is not required for growth *in vitro*, however, expression of SARS-CoV ORF6 can  
232 increase the replication kinetics of SARS-CoV and the related murine hepatitis virus *in*

233 *vitro* (20, 21). In addition, recombinant SARS-CoV isolates containing ORF6 grow to  
234 higher viral loads than recombinant isolates lacking ORF6 (20). This enhancement in  
235 viral growth could be attributed to SARS-CoV ORF6's ability to downregulate cellular  
236 protein expression through interactions with the Rae1•Nup98 complex. As SARS-CoV-2  
237 ORF6 similarly interacts with Rae1 and Nup98, we speculate ORF6 is required for  
238 optimal growth of SARS-CoV-2.

239 In addition to enhancing viral replication, preventing the nuclear export of mRNA  
240 can suppress the host's antiviral response (1–3). The ability of the M protein of VSV to  
241 bind Rae1 and Nup98 and prevent mRNA nuclear export is associated with suppressed  
242 interferon- $\beta$  gene expression (22). Furthermore, VSV strains containing a mutation at  
243 the residue responsible for the VSV M-Rae1-Nup98 interactions induce significantly  
244 higher interferon- $\alpha$  protein levels than strains containing wild-type alleles of the M  
245 protein (23). SARS-CoV-2 ORF6 has been shown to be an interferon antagonist (24)  
246 and likely downregulates interferon expression and host antiviral responses in a similar  
247 manner to VSV M through its interaction with the Rae1•Nup98 complex.

248 To date, SARS-CoV-2 has caused several thousand-fold more infections than  
249 SARS-CoV in part due to the distinct clinical presentations between the two viruses.  
250 COVID-19 patients display peak viral loads and maximum infectivity upon the onset of  
251 symptoms rather than after the onset of symptoms which is typical in patient with SARS  
252 (25). Furthermore, asymptomatic transmission was infrequently reported for SARS-CoV  
253 (26, 27), however, pre-symptomatic and asymptomatic transmission have been a  
254 defining challenge of the current SARS-CoV-2 pandemic (28–30). Both the delayed  
255 onset of clinical symptoms and pre-symptomatic and asymptomatic transmission of



256 SARS-CoV-2 could be attributed to increased potency of interferon antagonization in  
257 SARS-CoV-2 compared to SARS-CoV. ORF6 has already been shown to be a major  
258 interferon antagonist in both SARS-CoV and SARS-CoV-2 (16, 24, 31). ORF6 is one of  
259 the least similar accessory proteins (69% identical by amino acid) between the two  
260 viruses. Coupled with our demonstration of SARS-CoV-2 ORF6 more strongly  
261 downregulating protein expression and co-purifying with more Rae1 and Nup98 than  
262 SARS-CoV ORF6, the differences between SARS-CoV ORF6 and SARS-CoV-2 ORF6  
263 could explain at least some of the differences in clinical presentations between SARS  
264 and COVID-19.

265         Large-scale SARS-CoV-2 genomic surveillance projects have demonstrated  
266 deletions can arise within the accessory genes of SARS-CoV-2 (32–34). Notably, none  
267 of these deletions have arisen in multiple SARS-CoV-2 lineages through multiple  
268 independent genomic rearrangement events. Our identification of 7 unrelated clinical  
269 isolates with the same ORF6 deletion suggests this deletion may be repeatedly selected  
270 for in SARS-CoV-2. This is further evidenced by the identification of a cultured SARS-  
271 CoV-2 that acquired the same deletion after successive passages in Vero cells (18).  
272 Similar to wild-type ORF6 allele, the clinical allele, ORF6  $\Delta$ 22-30, can repress  
273 expression of a co-transfected reporter and still retains the Rae1•Nup98 interacting  
274 motif of ORF6. Further work is required to understand the functional role of the ORF6 N-  
275 terminus and determine the selective pressures which are repeatedly selecting for the  
276 observed deletion.

277         Our study has a number of limitations. We relied on cellular overexpression  
278 systems of ORF6 which rely on nuclear export, making study of a likely nuclear export

279 inhibition factor difficult. As such, our results may not perfectly reflect the degree to  
280 which host mRNA nuclear export and protein expression is downregulated during  
281 SARS-CoV-2 infection, which does not rely on nuclear export for ORF6 expression.  
282 More comparative work between SARS-CoV-2 and SARS-CoV ORF6 is needed in the  
283 context of viral replication. It would be intriguing to swap ORF6 between SARS-CoV and  
284 SARS-CoV-2 isolates to test the hypothesis that ORF6 is the major determinant of  
285 interferon antagonization and delayed symptom onset in animal models of SARS-CoV-  
286 2. Furthermore, additional work is required to understand the degree of mRNA export  
287 inhibition in both viruses.

288 In summary, our results demonstrate the accessory protein ORF6 of SARS-CoV-  
289 2 strongly inhibits reporter protein expression and imprisons mRNA in the nucleus via its  
290 interactions with the mRNA nuclear export factor Rae1 and the nuclear pore complex  
291 component Nup98. As ORF6 is a major interferon antagonist in *Sarbecoviruses*,  
292 differences in ORF6 sequence content may be major determinants of differences in  
293 clinical presentation among these viruses that so clearly have the world's attention.

294

## 295 **Methods**

296 *Specimen collection and whole genome sequencing of SARS-CoV-2 positive clinical*  
297 *specimens*

298 Whole genome sequencing of SARS-CoV-2 positive clinical specimens was conducted  
299 as part of an ongoing University of Washington Institutional Review Board-approved  
300 study (STUDY00000408) (35–38). Nasopharyngeal swabs were collected from patients  
301 suspected to have an infection with SARS-CoV-2 and stored in 3 mL of viral transport

302 medium. RNA was extracted from 140  $\mu$ L of medium using the Qiagen Biorobot.  
303 Sequencing libraries were prepared as previously described (32). Briefly, RNA was  
304 treated with TURBO DNase (Thermo Fisher) and first-strand cDNA was synthesized  
305 using Superscript IV (Thermo Fisher) and random hexamers (IDT). Double stranded  
306 cDNA was created using Sequenase Version 2.0 (Thermo Fisher) and purified using  
307 1.6x volumes of AMPure XP beads (Beckman-Coulter). Multiplex amplicon sequencing  
308 libraries were constructed using Swift Biosciences' SARS-CoV-2 Multiplex Primer Pool  
309 and Normalase Amplicon kit and sequenced on a 2 x 300 bp run on an Illumina MiSeq.  
310 712,394 sequencing reads were obtained for the clinical SARS-CoV-2 sample,  
311 WA-UW-4752. Sequencing reads were quality- and adapter-trimmed using  
312 Trimmomatic v0.38 (ILLUMINACLIP:TruSeq3-PE-SNAP.fa:2:30:10:1:true LEADING:3  
313 TRAILING:3 SLIDINGWINDOW:4:30 MINLEN:75) (39) and aligned to the SARS-CoV-2  
314 reference genome (NC\_045512.2) using BMap version 38.70  
315 ([sourceforge.net/projects/bbmap/](https://sourceforge.net/projects/bbmap/)). Sequence reads were then clipped of synthetic PCR  
316 primers using Primerclip (<https://github.com/swiftbiosciences/primerclip>) and the final  
317 sequence alignment was visualized in Geneious version 11.1.4 (40).

318 The deletion identified within ORF6 of WA-UW-4752 was confirmed by reverse  
319 transcription PCR and Sanger sequencing. For reverse transcription, single-stranded  
320 cDNA was constructed using Superscript IV. The resulting cDNA was used as template  
321 for PCR with Phusion High-Fidelity Polymerase (Thermo Fisher) and the following  
322 primers: 5' ATCACGAACGCTTTCTTATTAC 3' and 5' CTCGTATGTTCCAGAAGAGC  
323 3'. PCR was conducted using the following conditions: 98°C for 30 seconds followed by  
324 35 cycles of 98°C for 10 seconds, 55°C for 15 seconds, and 72°C for 30 seconds

325 followed by a final extension at 72°C for 5 minutes. The resulting amplicons were run on  
326 a 2% agarose gel, extracted from the gel using the QIAquick Gel Extraction kit (Qiagen),  
327 and Sanger sequenced by Genewiz, Inc. with the same primers used for PCR.

328 Other strains with the same deletion in ORF6 were identified by querying GISAID  
329 (accessed July 17, 2020). The genetic relatedness of these strains was assessed by  
330 aligning the genomes of these strains as well as 110 other global clinical SARS-CoV-2  
331 strains using MAFFT v7.453 (41). A phylogenetic tree was generated using RAxML  
332 version 8.2.11 (42) and visualized with R (version 3.6.1) using the ggtree package (43).  
333 Strains were further classified using the web-based lineage assigner, Pangolin  
334 (<https://pangolin.cog-uk.io/>) (19).

335

### 336 *Cloning*

337 The wild-type, N- and C-terminal mutant SARS-CoV-2 ORF6 constructs were amplified  
338 from double-stranded cDNA from a previously sequenced clinical SARS-CoV-2 isolate  
339 (WA12-UW8; EPI\_ISL\_413563) using the primers listed in Table S2. CloneAmp Hi-Fi  
340 PCR Premix (Takara) and the following PCR conditions were used to generate the  
341 amplicons: 98°C for 2 minutes followed by 35 cycles of 98°C for 10 seconds, 55°C for  
342 15 seconds, and 72°C for 30 seconds followed by a final extension for 72°C for 5  
343 minutes. ORF6  $\Delta$ 22-30 was amplified from WA-UW-4572 (MT798143) and the matrix  
344 protein from vesicular stomatitis virus was amplified from pVSV eGFP dG (a gift from  
345 Connie Cepko; Addgene plasmid #31842) as described above using the primers listed  
346 in Table S2. A gBlock gene fragment (IDT) for ORF6 of SARS-CoV was synthesized  
347 based on the genome sequence of SARS-CoV isolate TW1 (AY291451.1). The

348 resulting amplicons and gene fragment were then cloned into a modified pLenti CMV  
349 GFP Puro plasmid (a gift from Eric Campeau & Paul Kaufman; Addgene plasmid  
350 #17448), which contains a 3' WPRE sequence following the insert and a 3' SV40  
351 polyadenylation signal after the puromycin resistance cassette, with an N-terminal GFP  
352 tag using the In-Fusion HD Cloning kit (Takara).

353 For cloning of Rae1, RNA was extracted from 239T cells using the RNeasy  
354 Miniprep kit (Qiagen) and cDNA was synthesized using Superscript IV and oligo dT  
355 (IDT). Rae1 was then amplified from the resulting cDNA using the primers listed in  
356 Table S2 and ClonAmp Hi-Fi PCR Premix under the following PCR conditions: 98°C  
357 for 2 minutes followed by 35 cycles of 98°C for 10 seconds, 55°C for 15 seconds, and  
358 72°C for 1 minute followed by a final extension for 72°C for 5 minutes. The resulting  
359 amplicon was cloned into a modified pcDNA4-TO vector with a C-terminal FLAG tag  
360 using the In-Fusion HD Cloning kit.

361

### 362 *Cell culture and ORF6-mCherry transient co-transfections*

363 293T cells were maintained in Dulbecco's Modified Eagle's Medium (GE Healthcare Life  
364 Sciences) supplemented with 10% FBS (Sigma-Aldrich), 1x HEPES (Thermo Fisher),  
365 and 1x GlutaMAX (Thermo Fisher) (293T media). Transient co-transfections with GFP-  
366 tagged constructs and a modified pLenti CMV Puro vector encoding the fluorescent  
367 reporter mCherry were conducted in 6-well plates. The day prior to transfection,  
368 500,000 293T cells were plated into each well of the 6-well plate and grown overnight  
369 until they reached approximately 50% confluency. The cells were then transfected with  
370 2 µg of GFP-tagged construct and 2 µg of mCherry using a 3:1 ratio of PEI MAX

371 (Polysciences) in Opti-MEM (Thermo Fisher). Cells were incubated for 24-48 hours  
372 following transfection and visualized using the EVOS M5000 Imaging System (Thermo  
373 Fisher) with GFP and Texas Red filter cubes.

374 mCherry fluorescence intensities were measured with ImageJ v1.53a by an  
375 individual blinded to experimental design. All images were 8-bit grayscale and  
376 2048x1536 (3.1 megapixels). Background thresholds were set at the same level across  
377 all images, and mean fluorescence intensity of regions of interest greater than 200  
378 pixels calculated. Three fields were analyzed for each experimental condition. The  
379 mean fluorescent intensity for each field was calculated after adjusting for background  
380 fluorescence signal and normalized to the control condition. Difference in mean  
381 fluorescent intensities between experimental conditions were assessed in R using the  
382 unpaired t-test.

383 Cell lysates were collected 24-48 hours after transfection using RIPA buffer  
384 (Thermo Fisher). The total protein content was measured using the Pierce BCA Protein  
385 Assay kit (Thermo Fisher) and 7.5 µg of lysate was run on a 4-12% Bis-Tris sodium  
386 dodecyl sulfate (SDS)-polyacrylamide gel with MOPS running buffer (Invitrogen) under  
387 reducing conditions. The samples were then transferred to a 0.45 µm nitrocellulose  
388 membrane using the XCell Blot II module (Invitrogen). Blotting was performed using the  
389 following primary antibodies: 1:1,000 anti-GFP (Cell Signaling; clone 4B10), 1:500 anti-  
390 mCherry (Cell Signaling; clone E5D8F), and 1:1,000 anti-alpha Tubulin (Cell Signaling;  
391 clone DM1A), which was followed by staining with either 1:10,000 IRDye 680RD anti-  
392 Mouse IgG secondary antibody (Licor) or 1:5,000 IRDye 800CW anti-Rabbit IgG

393 secondary antibody (Licor). Blots were then visualized on a Licor Odyssey imager using  
394 Image Studio version 2.0.

395

#### 396 *Oligo dT in situ hybridization*

397 293T cells were plated in 48-well plates at a density of 60,000 cells per well and grown  
398 overnight to approximately 50% confluency. Cells were transfected with 200 ng of  
399 plasmid DNA as described above and incubated for 24 hours. The cells were then  
400 washed with PBS (pH 7.4; without Ca<sup>2+</sup> or Mg<sup>2+</sup>) (Thermo Fisher) and fixed with 4%  
401 paraformaldehyde. The fixed cells were permeabilized with methanol and rehydrated in  
402 70% ethanol followed by 1M Tris-HCl (pH 8.0) (Invitrogen). The monolayer was then  
403 covered with hybridization buffer (1 mg/mL yeast tRNA, 0.005% bovine serum, 10%  
404 dextran sulfate and 25% formamide in 2x SSC buffer) containing an oligo dT(30) probe  
405 with an Alexa Fluor 594 fluorophore (IDT) attached to the 5' end of the probe and  
406 incubate overnight at 37°C. The hybridization buffer was removed and the cells were  
407 washed once with warmed 4x SSC buffer (Thermo Fisher), once with warmed 2x SSC  
408 buffer, and twice with room temperature 2x SSC buffer.

409 The cells were then blocked with 1% bovine serum in PBS containing 0.1%  
410 Tween 20 (PBST) for 1 hour. To detect the GFP-tagged proteins, the cells were  
411 incubated with a FITC conjugated anti-GFP antibody (Abcam) for 1 hour. The antibody  
412 was removed and the cells were washed three times with PBST. Nuclear staining was  
413 completed by incubating the cells in a 300 nM DAPI solution (Thermo Fisher) for 5  
414 minutes. The cells were washed twice with PBS and visualized on an EVOS M5000 with  
415 the GFP, Texas Red, and DAPI filter cubes.

416

417 *Affinity Purification of GFP-tagged constructs*

418 The day prior to transient transfection, 10-cm plates were seeded with  $4 \times 10^6$  293T cells  
419 and grown overnight to approximately 50% confluency. The cells were transfected with  
420 7  $\mu$ g of plasmid DNA using a 3:1 ratio of PEI MAX in Opti-MEM. Forty-four to 48 hours  
421 after transfection, the cells were washed with PBS and collected using PBS containing  
422 0.1 mM EDTA. The cells were pelleted, resuspended in 500  $\mu$ L TEN (50mM Tris 8.0,  
423 150mM NaCl, and 1mM EDTA) buffer with 0.5% NP-40, and lysed by rotation for 45-60  
424 minutes at 4°C. The lysates were centrifuged at 13,000 RPM for 5 minutes at 4°C and  
425 the supernatant was transferred to a new tube and cleared of residual IgG by rotation  
426 with Protein G Sepharose 4 Fast Flow (GE Healthcare Life Sciences) for 30 minutes at  
427 4°C. Cleared lysates were transferred to new tubes and incubated overnight at 4°C with  
428 anti-GFP Nanobody Affinity gel (BioLegend). The affinity gel was then pelleted and  
429 washed twice using TEN buffer with 0.1% NP-40 and resuspended in equal volumes of  
430 NuPage LDS Sample Buffer (Thermo) containing 143 mM 2-Mercaptoethanol (Sigma-  
431 Aldrich). Western blotting using the elutes from affinity purification and the pre-purified  
432 input lysates were performed as described above with the following primary antibodies:  
433 1:1,000 anti-GFP, 1:1,000 anti-alpha Tubulin, 1:2,000 anti-Rae1 (Abcam; clone  
434 EPR6923) and 1:1,000 anti-Nup98 (Abcam; clone 2H10).

435

436 *Rae1 rescue of mCherry expression*

437 293T cells were plated in 6-well plates at a seeding density of 500,000 cells per well  
438 and grown overnight until they reached approximately 50% confluency. Cells were then



439 transfected with 0.5 µg of the GFP-SARS-CoV-2 wild-type ORF6 construct, 0.5 µg of  
440 mCherry, and 0, 0.25, 0.5, 1, or 2 µg of Rae1-FLAG using a 3:1 ratio of PEI MAX in  
441 Opti-MEM. GFP and mCherry expression were visualized 44-48 hours following  
442 transfection using the EVOS M5000 imaging system with GFP and Texas Red filter  
443 cubes. Western blotting was performed as described above with the following primary  
444 antibodies: 1:1,000 anti-GFP, 1:500 anti-mCherry, 1:1,000 anti-alpha Tubulin, and  
445 1:1,000 anti-FLAG (Sigma; clone M2).

446

#### 447 *Data Availability*

448 Sequencing reads and genome assemblies are available under NCBI BioProject  
449 PRJNA610428.

450

451 **References**

- 452 1. Stern-Ginossar N, Thompson SR, Mathews MB, Mohr I. 2019. Translational  
453 Control in Virus-Infected Cells. *Cold Spring Harb Perspect Biol* 11:a033001.
- 454 2. Gale M, Tan S-L, Katze MG. 2000. Translational Control of Viral Gene Expression  
455 in Eukaryotes. *Microbiol Mol Biol Rev* 64:239–280.
- 456 3. Walsh D, Mohr I. 2011. Viral subversion of the host protein synthesis machinery.  
457 *Nat Rev Microbiol* 9:860–875.
- 458 4. Kuss SK, Mata MA, Zhang L, Fontoura BMA. 2013. Nuclear imprisonment: viral  
459 strategies to arrest host mRNA nuclear export. *Viruses* 5:1824–1849.
- 460 5. Sandri-Goldin RM. 2004. Viral Regulation of mRNA Export. *JVI* 78:4389–4396.
- 461 6. Faria PA, Chakraborty P, Levay A, Barber GN, Ezelle HJ, Enninga J, Arana C, van  
462 Deursen J, Fontoura BMA. 2005. VSV Disrupts the Rae1/mrnp41 mRNA Nuclear  
463 Export Pathway. *Molecular Cell* 17:93–102.
- 464 7. Park N, Katikaneni P, Skern T, Gustin KE. 2008. Differential Targeting of Nuclear  
465 Pore Complex Proteins in Poliovirus-Infected Cells. *JVI* 82:1647–1655.
- 466 8. Gong D, Kim YH, Xiao Y, Du Y, Xie Y, Lee KK, Feng J, Farhat N, Zhao D, Shu S,  
467 Dai X, Chanda SK, Rana TM, Krogan NJ, Sun R, Wu T-T. 2016. A Herpesvirus  
468 Protein Selectively Inhibits Cellular mRNA Nuclear Export. *Cell Host Microbe*  
469 20:642–653.

- 470 9. Pritchard CE, Fornerod M, Kasper LH, van Deursen JM. 1999. RAE1 is a shuttling  
471 mRNA export factor that binds to a GLEBS-like NUP98 motif at the nuclear pore  
472 complex through multiple domains. *J Cell Biol* 145:237–254.
- 473 10. Ren Y, Seo H-S, Blobel G, Hoelz A. 2010. Structural and functional analysis of the  
474 interaction between the nucleoporin Nup98 and the mRNA export factor Rae1.  
475 *Proceedings of the National Academy of Sciences* 107:10406–10411.
- 476 11. Quan B, Seo H-S, Blobel G, Ren Y. 2014. Vesiculoviral matrix (M) protein occupies  
477 nucleic acid binding site at nucleoporin pair (Rae1 • Nup98). *Proc Natl Acad Sci*  
478 *USA* 111:9127–9132.
- 479 12. Rajani KR, Pettit Kneller EL, McKenzie MO, Horita DA, Chou JW, Lyles DS. 2012.  
480 Complexes of Vesicular Stomatitis Virus Matrix Protein with Host Rae1 and Nup98  
481 Involved in Inhibition of Host Transcription. *PLoS Pathog* 8:e1002929.
- 482 13. Gordon DE, Jang GM, Bouhaddou M, Xu J, Obernier K, White KM, O’Meara MJ,  
483 Rezelj VV, Guo JZ, Swaney DL, Tummino TA, Huettenhain R, Kaake RM, Richards  
484 AL, Tutuncuoglu B, Foussard H, Batra J, Haas K, Modak M, Kim M, Haas P,  
485 Polacco BJ, Braberg H, Fabius JM, Eckhardt M, Soucheray M, Bennett MJ, Cakir  
486 M, McGregor MJ, Li Q, Meyer B, Roesch F, Vallet T, Mac Kain A, Miorin L, Moreno  
487 E, Naing ZZC, Zhou Y, Peng S, Shi Y, Zhang Z, Shen W, Kirby IT, Melnyk JE,  
488 Chorba JS, Lou K, Dai SA, Barrio-Hernandez I, Memon D, Hernandez-Armenta C,  
489 Lyu J, Mathy CJP, Perica T, Pilla KB, Ganesan SJ, Saltzberg DJ, Rakesh R, Liu X,  
490 Rosenthal SB, Calviello L, Venkataramanan S, Liboy-Lugo J, Lin Y, Huang X-P, Liu  
491 Y, Wankowicz SA, Bohn M, Safari M, Ugur FS, Koh C, Savar NS, Tran QD,

- 492 Shengjuler D, Fletcher SJ, O'Neal MC, Cai Y, Chang JCJ, Broadhurst DJ,  
493 Klippsten S, Sharp PP, Wenzell NA, Kuzuoglu D, Wang H-Y, Trenker R, Young  
494 JM, Cavero DA, Hiatt J, Roth TL, Rathore U, Subramanian A, Noack J, Hubert M,  
495 Stroud RM, Frankel AD, Rosenberg OS, Verba KA, Agard DA, Ott M, Emerman M,  
496 Jura N, von Zastrow M, Verdin E, Ashworth A, Schwartz O, d'Enfert C, Mukherjee  
497 S, Jacobson M, Malik HS, Fujimori DG, Ideker T, Craik CS, Floor SN, Fraser JS,  
498 Gross JD, Sali A, Roth BL, Ruggero D, Taunton J, Kortemme T, Beltrao P,  
499 Vignuzzi M, García-Sastre A, Shokat KM, Shoichet BK, Krogan NJ. 2020. A SARS-  
500 CoV-2 protein interaction map reveals targets for drug repurposing. *Nature*  
501 <https://doi.org/10.1038/s41586-020-2286-9>.
- 502 14. Zhu N, Zhang D, Wang W, Li X, Yang B, Song J, Zhao X, Huang B, Shi W, Lu R,  
503 Niu P, Zhan F, Ma X, Wang D, Xu W, Wu G, Gao GF, Tan W. 2020. A Novel  
504 Coronavirus from Patients with Pneumonia in China, 2019. *N Engl J Med* 382:727–  
505 733.
- 506 15. Narayanan K, Huang C, Makino S. 2008. SARS coronavirus accessory proteins.  
507 *Virus Research* 133:113–121.
- 508 16. Frieman M, Yount B, Heise M, Kopecky-Bromberg SA, Palese P, Baric RS. 2007.  
509 Severe acute respiratory syndrome coronavirus ORF6 antagonizes STAT1 function  
510 by sequestering nuclear import factors on the rough endoplasmic reticulum/Golgi  
511 membrane. *J Virol* 81:9812–9824.

- 512 17. Gunalan V, Mirazimi A, Tan Y-J. 2011. A putative diacidic motif in the SARS-CoV  
513 ORF6 protein influences its subcellular localization and suppression of expression  
514 of co-transfected expression constructs. *BMC Res Notes* 4:446.
- 515 18. Riojas MA, Frank AM, Puthuveetil NP, Flores B, Parker M, King SP, Peiris M, Chu  
516 DKW, Benton B, Bradford R, Hazbón MH, Rashid S. 2020. A Rare Deletion in  
517 SARS-CoV-2 ORF6 Dramatically Alters the Predicted Three-Dimensional Structure  
518 of the Resultant Protein. preprint, Genomics.
- 519 19. Rambaut A, Holmes EC, Hill V, O'Toole Á, McCrone J, Ruis C, du Plessis L, Pybus  
520 OG. 2020. A dynamic nomenclature proposal for SARS-CoV-2 to assist genomic  
521 epidemiology. preprint, Microbiology.
- 522 20. Zhao J, Falcón A, Zhou H, Netland J, Enjuanes L, Pérez Breña P, Perlman S.  
523 2009. Severe Acute Respiratory Syndrome Coronavirus Protein 6 Is Required for  
524 Optimal Replication. *JVI* 83:2368–2373.
- 525 21. Hussain S, Perlman S, Gallagher TM. 2008. Severe Acute Respiratory Syndrome  
526 Coronavirus Protein 6 Accelerates Murine Hepatitis Virus Infections by More than  
527 One Mechanism. *JVI* 82:7212–7222.
- 528 22. Ahmed M, McKenzie MO, Puckett S, Hojnacki M, Poliquin L, Lyles DS. 2003.  
529 Ability of the Matrix Protein of Vesicular Stomatitis Virus To Suppress Beta  
530 Interferon Gene Expression Is Genetically Correlated with the Inhibition of Host  
531 RNA and Protein Synthesis. *JVI* 77:4646–4657.

- 532 23. Stojdl DF, Lichty BD, tenOever BR, Paterson JM, Power AT, Knowles S, Marius R,  
533 Reynard J, Poliquin L, Atkins H, Brown EG, Durbin RK, Durbin JE, Hiscott J, Bell  
534 JC. 2003. VSV strains with defects in their ability to shutdown innate immunity are  
535 potent systemic anti-cancer agents. *Cancer Cell* 4:263–275.
- 536 24. Yuen C-K, Lam J-Y, Wong W-M, Mak L-F, Wang X, Chu H, Cai J-P, Jin D-Y, To  
537 KK-W, Chan JF-W, Yuen K-Y, Kok K-H. 2020. SARS-CoV-2 nsp13, nsp14, nsp15  
538 and orf6 function as potent interferon antagonists. *Emerging Microbes & Infections*  
539 9:1418–1428.
- 540 25. Petersen E, Koopmans M, Go U, Hamer DH, Petrosillo N, Castelli F, Storgaard M,  
541 Al Khalili S, Simonsen L. 2020. Comparing SARS-CoV-2 with SARS-CoV and  
542 influenza pandemics. *The Lancet Infectious Diseases* S1473309920304849.
- 543 26. Wilder-Smith A, Telemann MD, Heng BH, Earnest A, Ling AE, Leo YS. 2005.  
544 Asymptomatic SARS Coronavirus Infection among Healthcare Workers, Singapore.  
545 *Emerg Infect Dis* 11:1142–1145.
- 546 27. Lee HKK, Tso EYK, Chau TN, Tsang OTY, K, Choi W, Lai TST. 2003.  
547 Asymptomatic Severe Acute Respiratory Syndrome–associated Coronavirus  
548 Infection. *Emerg Infect Dis* 9:1491–1492.
- 549 28. Bai Y, Yao L, Wei T, Tian F, Jin D-Y, Chen L, Wang M. 2020. Presumed  
550 Asymptomatic Carrier Transmission of COVID-19. *JAMA* 323:1406.

- 551 29. Wei WE, Li Z, Chiew CJ, Yong SE, Toh MP, Lee VJ. 2020. Presymptomatic  
552 Transmission of SARS-CoV-2 - Singapore, January 23-March 16, 2020. *MMWR*  
553 *Morb Mortal Wkly Rep* 69:411–415.
- 554 30. Roxby AC, Greninger AL, Hatfield KM, Lynch JB, Dellit TH, James A, Taylor J,  
555 Page LC, Kimball A, Arons M, Schieve LA, Munanga A, Stone N, Jernigan JA,  
556 Reddy SC, Lewis J, Cohen SA, Jerome KR, Duchin JS, Neme S. 2020. Detection  
557 of SARS-CoV-2 Among Residents and Staff Members of an Independent and  
558 Assisted Living Community for Older Adults - Seattle, Washington, 2020. *MMWR*  
559 *Morb Mortal Wkly Rep* 69:416–418.
- 560 31. Kopecky-Bromberg SA, Martínez-Sobrido L, Frieman M, Baric RA, Palese P. 2007.  
561 Severe acute respiratory syndrome coronavirus open reading frame (ORF) 3b,  
562 ORF 6, and nucleocapsid proteins function as interferon antagonists. *J Virol*  
563 81:548–557.
- 564 32. Addetia A, Xie H, Roychoudhury P, Shrestha L, Loprieno M, Huang M-L, Jerome  
565 KR, Greninger AL. 2020. Identification of multiple large deletions in ORF7a  
566 resulting in in-frame gene fusions in clinical SARS-CoV-2 isolates. *Journal of*  
567 *Clinical Virology* 129:104523.
- 568 33. Holland LA, Kaelin EA, Maqsood R, Estifanos B, Wu LI, Varsani A, Halden RU,  
569 Hogue BG, Scotch M, Lim ES. 2020. An 81 nucleotide deletion in SARS-CoV-2  
570 ORF7a identified from sentinel surveillance in Arizona (Jan-Mar 2020). *J Virol*  
571 *JVI.00711-20, jvi;JVI.00711-20v1.*

- 572 34. Su YC, Anderson DE, Young BE, Zhu F, Linster M, Kalimuddin S, Low JG, Yan Z,  
573 Jayakumar J, Sun L, Yan GZ, Mendenhall IH, Leo Y-S, Lye DC, Wang L-F, Smith  
574 GJ. 2020. Discovery of a 382-nt deletion during the early evolution of SARS-CoV-2.  
575 preprint, Microbiology.
- 576 35. Fauver JR, Petrone ME, Hodcroft EB, Shioda K, Ehrlich HY, Watts AG, Vogels  
577 CBF, Brito AF, Alpert T, Muyombwe A, Razeq J, Downing R, Cheemarla NR, Wyllie  
578 AL, Kalinich CC, Ott IM, Quick J, Loman NJ, Neugebauer KM, Greninger AL,  
579 Jerome KR, Roychoudhury P, Xie H, Shrestha L, Huang M-L, Pitzer VE, Iwasaki A,  
580 Omer SB, Khan K, Bogoch II, Martinello RA, Foxman EF, Landry ML, Neher RA,  
581 Ko AI, Grubaugh ND. 2020. Coast-to-Coast Spread of SARS-CoV-2 during the  
582 Early Epidemic in the United States. *Cell* 181:990-996.e5.
- 583 36. Bedford T, Greninger AL, Roychoudhury P, Starita LM, Famulare M, Huang M-L,  
584 Nalla A, Pepper G, Reinhardt A, Xie H, Shrestha L, Nguyen TN, Adler A,  
585 Brandstetter E, Cho S, Giroux D, Han PD, Fay K, Frazar CD, Ilcisin M, Lacombe K,  
586 Lee J, Kiavand A, Richardson M, Sibley TR, Truong M, Wolf CR, Nickerson DA,  
587 Rieder MJ, Englund JA, the Seattle Flu Study Investigators, Hadfield J, Hodcroft  
588 EB, Huddleston J, Moncla LH, Müller NF, Neher RA, Deng X, Gu W, Federman S,  
589 Chiu C, Duchin J, Gautom R, Melly G, Hiatt B, Dykema P, Lindquist S, Queen K,  
590 Tao Y, Uehara A, Tong S, MacCannell D, Armstrong GL, Baird GS, Chu HY,  
591 Shendure J, Jerome KR. 2020. Cryptic transmission of SARS-CoV-2 in  
592 Washington State. preprint, Epidemiology.



- 593 37. Deng X, Gu W, Federman S, du Plessis L, Pybus OG, Faria NR, Wang C, Yu G,  
594 Bushnell B, Pan C-Y, Guevara H, Sotomayor-Gonzalez A, Zorn K, Gopez A,  
595 Servellita V, Hsu E, Miller S, Bedford T, Greninger AL, Roychoudhury P, Starita  
596 LM, Famulare M, Chu HY, Shendure J, Jerome KR, Anderson C, Gangavarapu K,  
597 Zeller M, Spencer E, Andersen KG, MacCannell D, Paden CR, Li Y, Zhang J, Tong  
598 S, Armstrong G, Morrow S, Willis M, Matyas BT, Mase S, Kasirye O, Park M,  
599 Masinde G, Chan C, Yu AT, Chai SJ, Villarino E, Bonin B, Wadford DA, Chiu CY.  
600 2020. Genomic surveillance reveals multiple introductions of SARS-CoV-2 into  
601 Northern California. *Science* 369:582–587.
- 602 38. Lieberman NAP, Peddu V, Xie H, Shrestha L, Huang M-L, Mears MC, Cajimat MN,  
603 Bente DA, Shi P-Y, Bovier F, Roychoudhury P, Jerome KR, Moscona A, Porotto M,  
604 Greninger AL. 2020. *In vivo* antiviral host response to SARS-CoV-2 by viral load,  
605 sex, and age. preprint, *Microbiology*.
- 606 39. Bolger AM, Lohse M, Usadel B. 2014. Trimmomatic: a flexible trimmer for Illumina  
607 sequence data. *Bioinformatics* 30:2114–2120.
- 608 40. Kearse M, Moir R, Wilson A, Stones-Havas S, Cheung M, Sturrock S, Buxton S,  
609 Cooper A, Markowitz S, Duran C, Thierer T, Ashton B, Meintjes P, Drummond A.  
610 2012. Geneious Basic: An integrated and extendable desktop software platform for  
611 the organization and analysis of sequence data. *Bioinformatics* 28:1647–1649.
- 612 41. Katoh K, Standley DM. 2013. MAFFT multiple sequence alignment software  
613 version 7: improvements in performance and usability. *Mol Biol Evol* 30:772–780.

614 42. Stamatakis A. 2014. RAxML version 8: a tool for phylogenetic analysis and post-  
615 analysis of large phylogenies. *Bioinformatics* 30:1312–1313.

616 43. Yu G, Smith DK, Zhu H, Guan Y, Lam TT-Y. 2017. GGTREE<sup>2</sup>: an R package for  
617 visualization and annotation of phylogenetic trees with their covariates and other  
618 associated data. *Methods Ecol Evol* 8:28–36.

619

620

621 **Figure Legends**

622 **Figure 1.** Multiple clinical SARS-CoV-2 isolates and a serially passaged cultured SARS-  
623 CoV-2 isolate contain a 9-amino acid deletion in ORF6. A) Schematic representation of  
624 the 9-amino acid deletion in ORF6 identified through whole genome sequencing of the  
625 clinical SARS-CoV-2 clinical isolate, WA-UW-4572. B) RT-PCR with primers spanning  
626 ORF6 yielded a 452 bp PCR product for WA-UW-4572 rather than a 479 bp product  
627 confirming the ORF6 deletion in WA-UW-4572. C) Six other clinical isolates and a  
628 cultured isolate with an identified deletion in ORF6 were identified by analyzing the  
629 ORF6 sequences of 67,000 publicly available SARS-CoV-2 genomes. The isolates  
630 were genetically distinct and belonged to both major SARS-CoV-2 lineages.

631

632 **Figure 2.** ORF6 of SARS-CoV-2 results in reduced mCherry reporter protein expression  
633 in 293T cells. A) Schematic representation of ORF6 constructs used in this study. B)  
634 293T cells were transiently transfected with GFP-tagged constructs and mCherry and  
635 visualized 48 hours after transfection. All images were taken with identical fluorescence  
636 gain settings. C) The fluorescent intensities for 3 fields per co-transfection were  
637 measured with ImageJ and displayed as mean  $\pm$  standard error. Wild-type (WT) ORF6  
638 caused a significant reduction in mCherry expression. ORF6 constructs with deletions  
639 or a single amino acid substitution (Met58Ala) in the C-terminus showed a smaller  
640 reduction in mCherry expression than WT ORF6. Cell lysates were collected for each of  
641 the conditions and D) western blotting and E) densitometry confirmed the role of the C-  
642 terminus of ORF6 in reducing protein expression in transfected cells. \*  $p < 0.05$ ; \*\*  $p <$   
643 0.01.

644

645 **Figure 3.** ORF6 causes mRNA to accumulate within the nucleus. 293T cells were  
646 transiently transfected with GFP-tagged constructs, incubated for 24 hours, and stained  
647 for GFP, poly-A mRNA, and DNA. mRNA in cells transfected with GFP or ORF6  
648 Met58Ala was diffusely present throughout the cell. Cells transfected with ORF6 or VSV  
649 M showed an accumulation of mRNA within the nucleus (white arrows).

650

651 **Figure 4.** Affinity purification of GFP-tagged constructs. 293T were transiently  
652 transfected with GFP-tagged constructs. Forty-eight hours after transfection, the GFP-  
653 tagged proteins were rapidly captured using an anti-GFP resin. Western blotting  
654 revealed ORF6 interacts with the mRNA nuclear export factor Rae1 and the nuclear  
655 pore complex protein Nup98. ORF6 constructs with C-terminal deletions or a  
656 substitution did not pull down Rae1 or Nup98.

657

658 **Figure 5.** Overexpression of Rae1 rescues mCherry expression in cells transfected with  
659 ORF6. A) 293T cells were co-transfected with equal amounts GFP-ORF6 and mCherry  
660 and an increasing amount of Rae1. Expression of the fluorescent reporters was  
661 visualized and B) quantified 48 hours after transfection. In the presence of ORF6,  
662 mCherry expression was restored in a dose-dependent manner. C) Western blotting  
663 and D) densitometry confirmed mCherry expression was rescued in a dose-dependent  
664 manner with of increasing Rae1-FLAG. \*  $p < 0.05$ .

665

666 **Figure 6.** SARS-CoV-2 ORF6 represses reporter expression and copurifies with  
667 relatively more Rae1-Nup98 than SARS-CoV ORF6. A) Comparison between the amino  
668 acid sequences of ORF6 of SARS-CoV and ORF6 of SARS-CoV-2. Residues differing  
669 between the two viruses are highlighted in red. The residue (Met58) implicated in  
670 binding the Rae1•Nup98 complex is highlighted in blue. B) 293T were transiently  
671 transfected with GFP-tagged constructs and mCherry and visualized 24 hours after  
672 transfection. Cells transfected with SARS-CoV-2 ORF6 showed C) significantly reduced  
673 mCherry expression compared to those transfected with SARS-CoV ORF6. D) Western  
674 blotting showed decreased expression of SARS-CoV-2 ORF6 compared to SARS-CoV  
675 ORF6 in 293T cells. E) Affinity purification of GFP-tagged constructs demonstrates both  
676 ORF6 of SARS-CoV and ORF6 of SARS-CoV-2 interact with Rae1 and Nup98.  
677 Densitometry shows SARS-CoV-2 ORF6 copurifies with relatively more F) Rae1 and G)  
678 Nup98 compared SARS-CoV ORF6. \*  $p < 0.05$ ; \*\*  $p < 0.01$ .

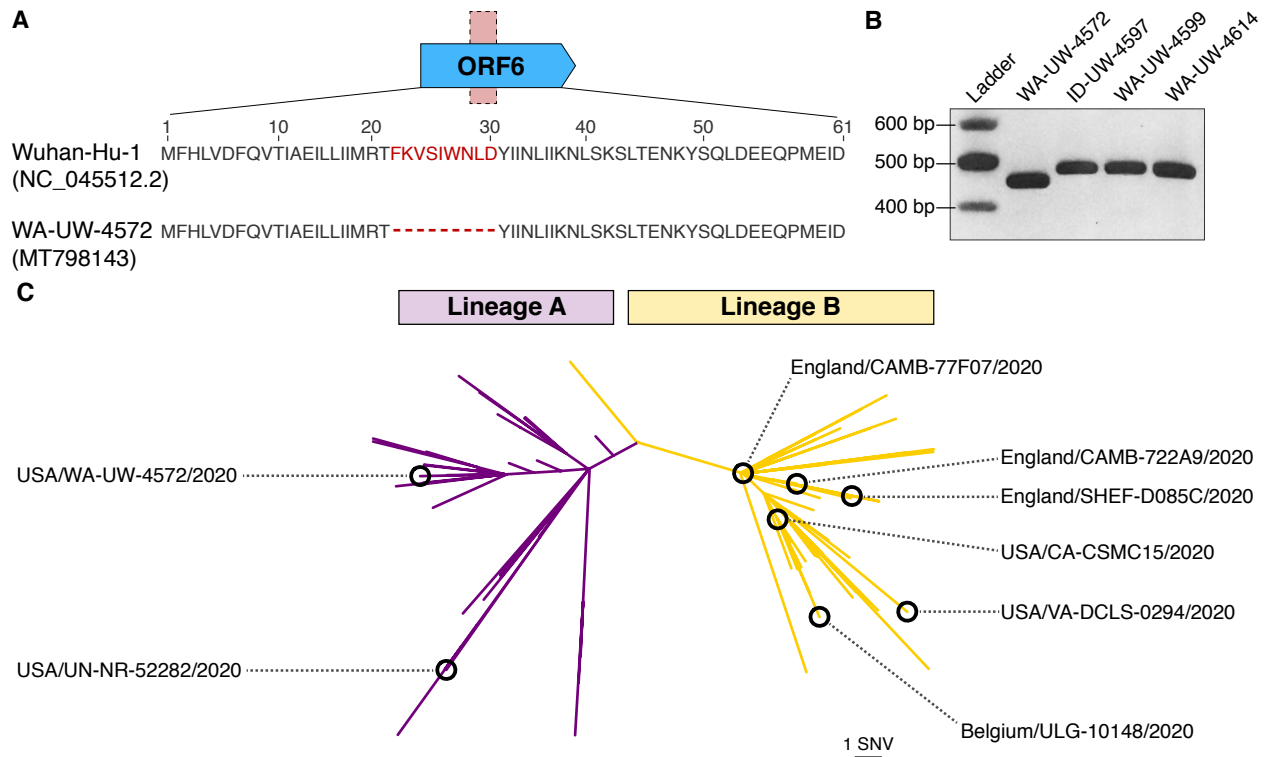

**Figure 1.** Multiple clinical SARS-CoV-2 isolates and a serially passaged cultured SARS-CoV-2 isolate contain a 9-amino acid deletion in ORF6. A) Schematic representation of the 9-amino acid deletion in ORF6 identified through whole genome sequencing of the clinical SARS-CoV-2 clinical isolate, WA-UW-4572. B) RT-PCR with primers spanning ORF6 yielded a 452 bp PCR product for WA-UW-4572 rather than a 479 bp product confirming the ORF6 deletion in WA-UW-4572. C) Six other clinical isolates and a cultured isolate with an identified deletion in ORF6 were identified by analyzing the ORF6 sequences of 67,000 publicly available SARS-CoV-2 genomes. The isolates were genetically distinct and belonged to both major SARS-CoV-2 lineages.

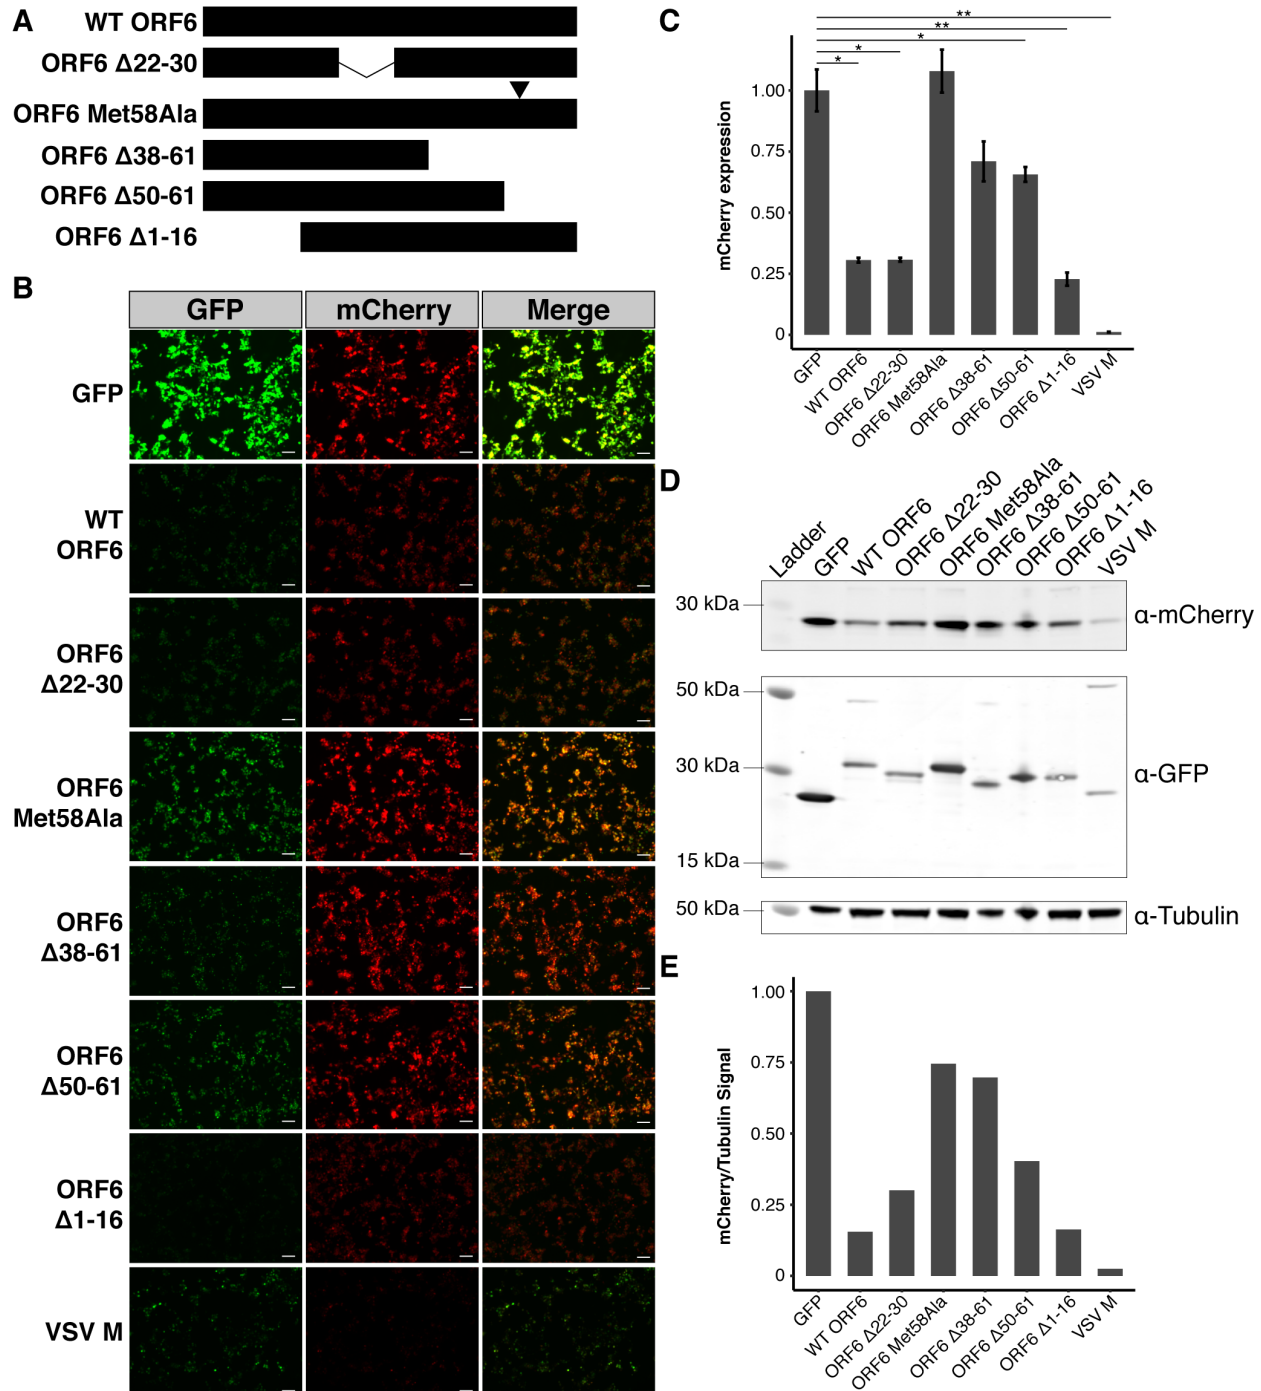

**Figure 2.** ORF6 of SARS-CoV-2 results in reduced mCherry reporter protein expression in 293T cells. A) Schematic representation of ORF6 constructs used in this study. B) 293T cells were transiently transfected with GFP-tagged constructs and mCherry and visualized 48 hours after transfection. All images were taken with identical fluorescence gain settings. C) The fluorescent intensities for 3 fields per co-transfection were measured with ImageJ and displayed as mean  $\pm$  standard error. Wild-type (WT) ORF6 caused a significant reduction in mCherry expression. ORF6 constructs with deletions or a single amino acid substitution (Met58Ala) in the C-terminus showed a smaller reduction in mCherry expression than WT ORF6. Cell lysates were collected for each of the conditions and D) western blotting and E) densitometry confirmed the role of the C-terminus of ORF6 in reducing protein expression in transfected cells. \*  $p < 0.05$ ; \*\*  $p < 0.01$ . Scale bar: 100  $\mu$ m.



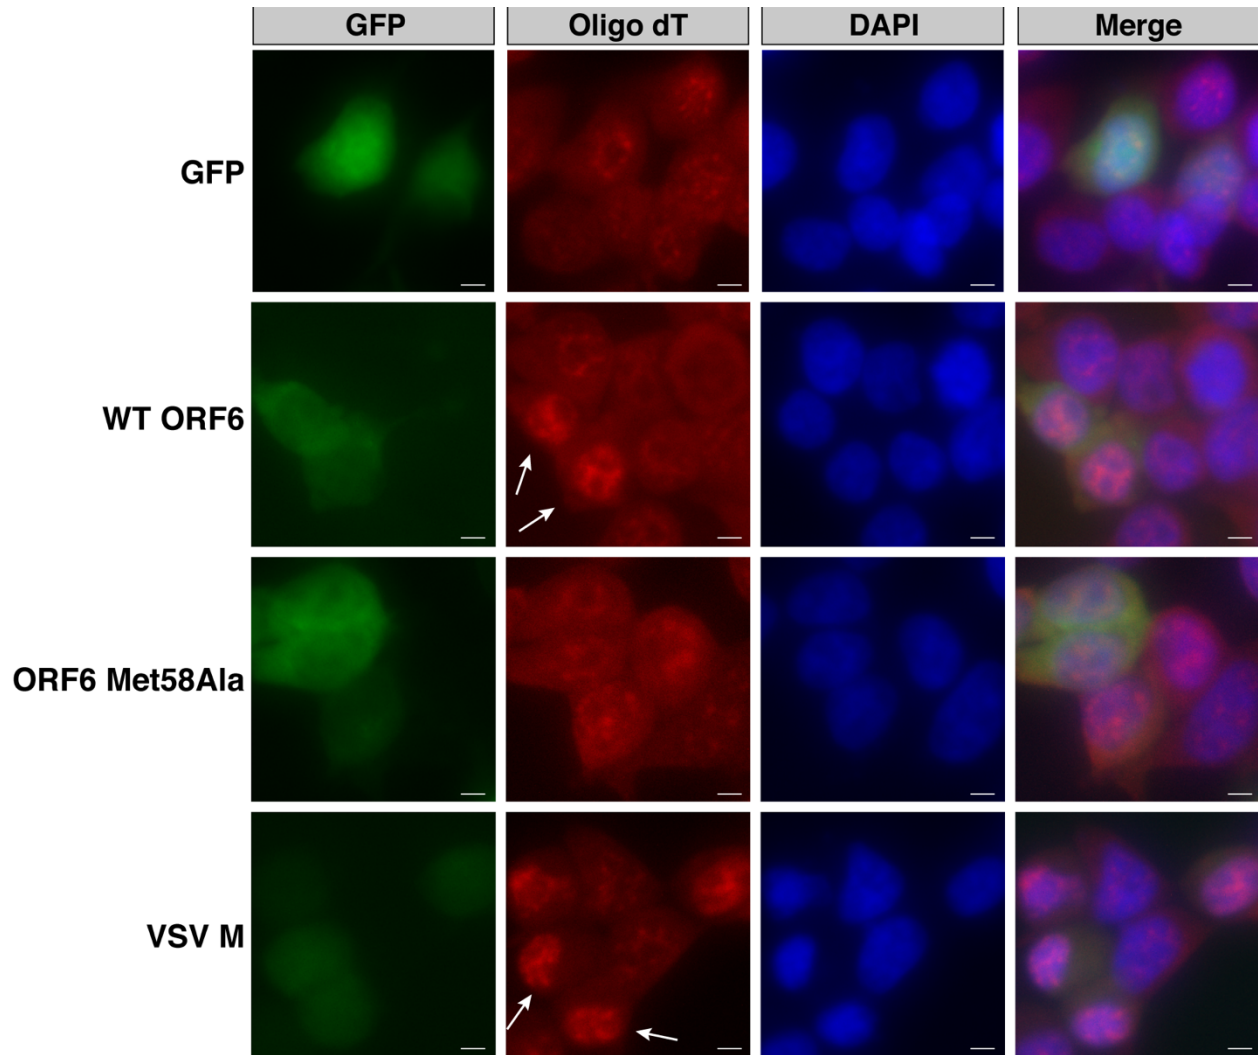

**Figure 3.** ORF6 causes mRNA to accumulate within the nucleus. 293T cells were transiently transfected with GFP-tagged constructs, incubated for 24 hours, and stained for GFP, poly-A mRNA, and DNA. mRNA in cells transfected with GFP or ORF6 Met58Ala was diffusely present throughout the cell. Cells transfected with ORF6 or VSV M showed an accumulation of mRNA within the nucleus (white arrows). Scale bar: 5  $\mu$ m.



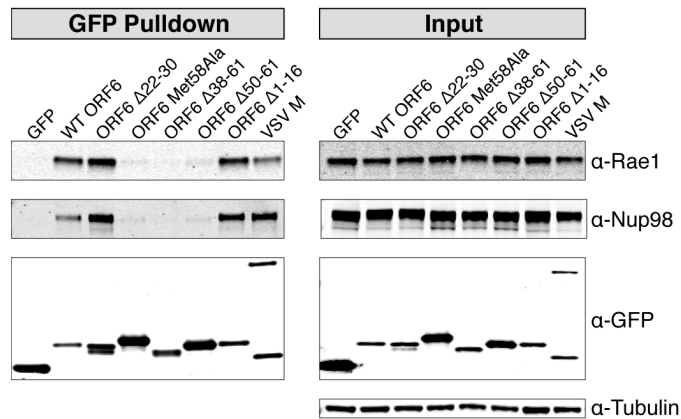

**Figure 4.** Affinity purification of GFP-tagged constructs. 293T were transiently transfected with GFP-tagged constructs. Forty-eight hours after transfection, the GFP-tagged proteins were rapidly captured using an anti-GFP resin. Western blotting revealed ORF6 interacts with the mRNA nuclear export factor Rae1 and the nuclear pore complex protein Nup98. ORF6 constructs with C-terminal deletions or a substitution did not pull down Rae1 or Nup98.

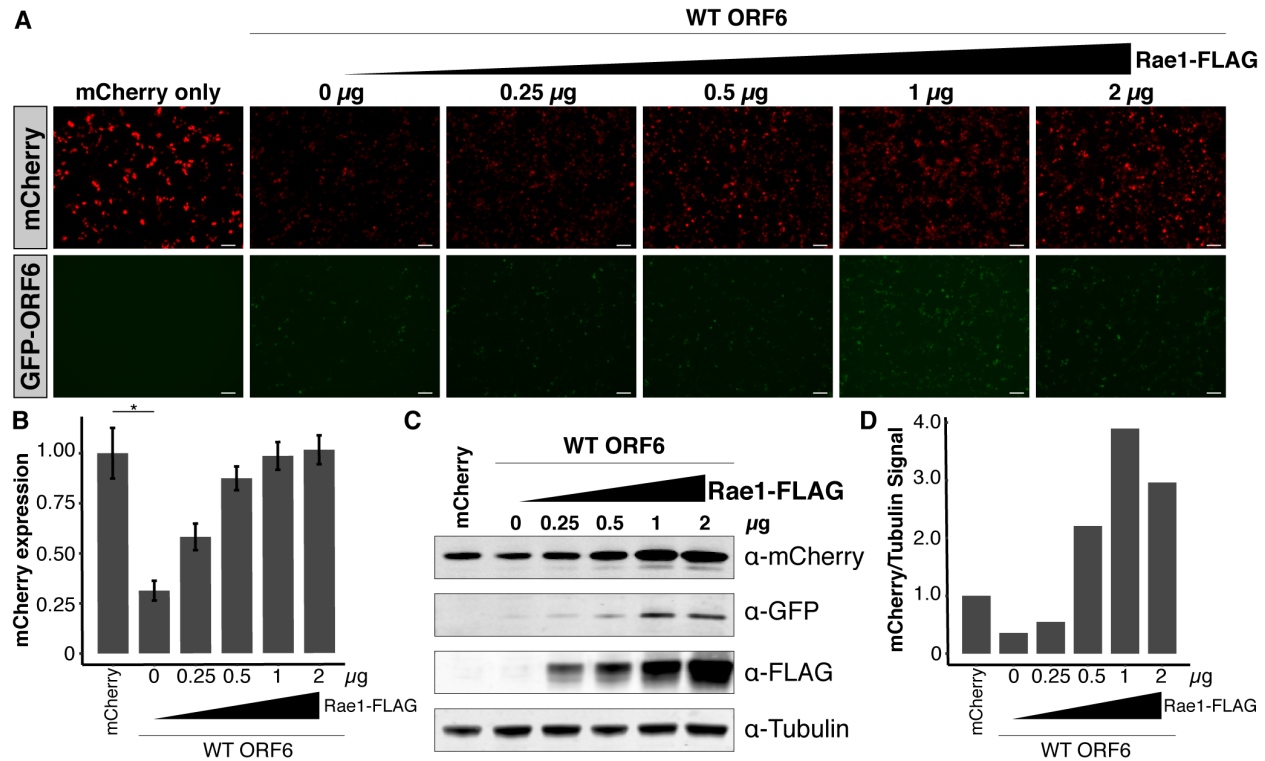

**Figure 5.** Overexpression of Rae1 rescues mCherry expression in cells transfected with ORF6. A) 293T cells were co-transfected with equal amounts GFP-ORF6 and mCherry and an increasing amount of Rae1. Expression of the fluorescent reporters was visualized and B) quantified 48 hours after transfection. In the presence of ORF6, mCherry expression was restored in a dose-dependent manner. C) Western blotting and D) densitometry confirmed mCherry expression was rescued in a dose-dependent manner with of increasing Rae1-FLAG. \*  $p < 0.05$ . Scale bar: 100  $\mu$ m.

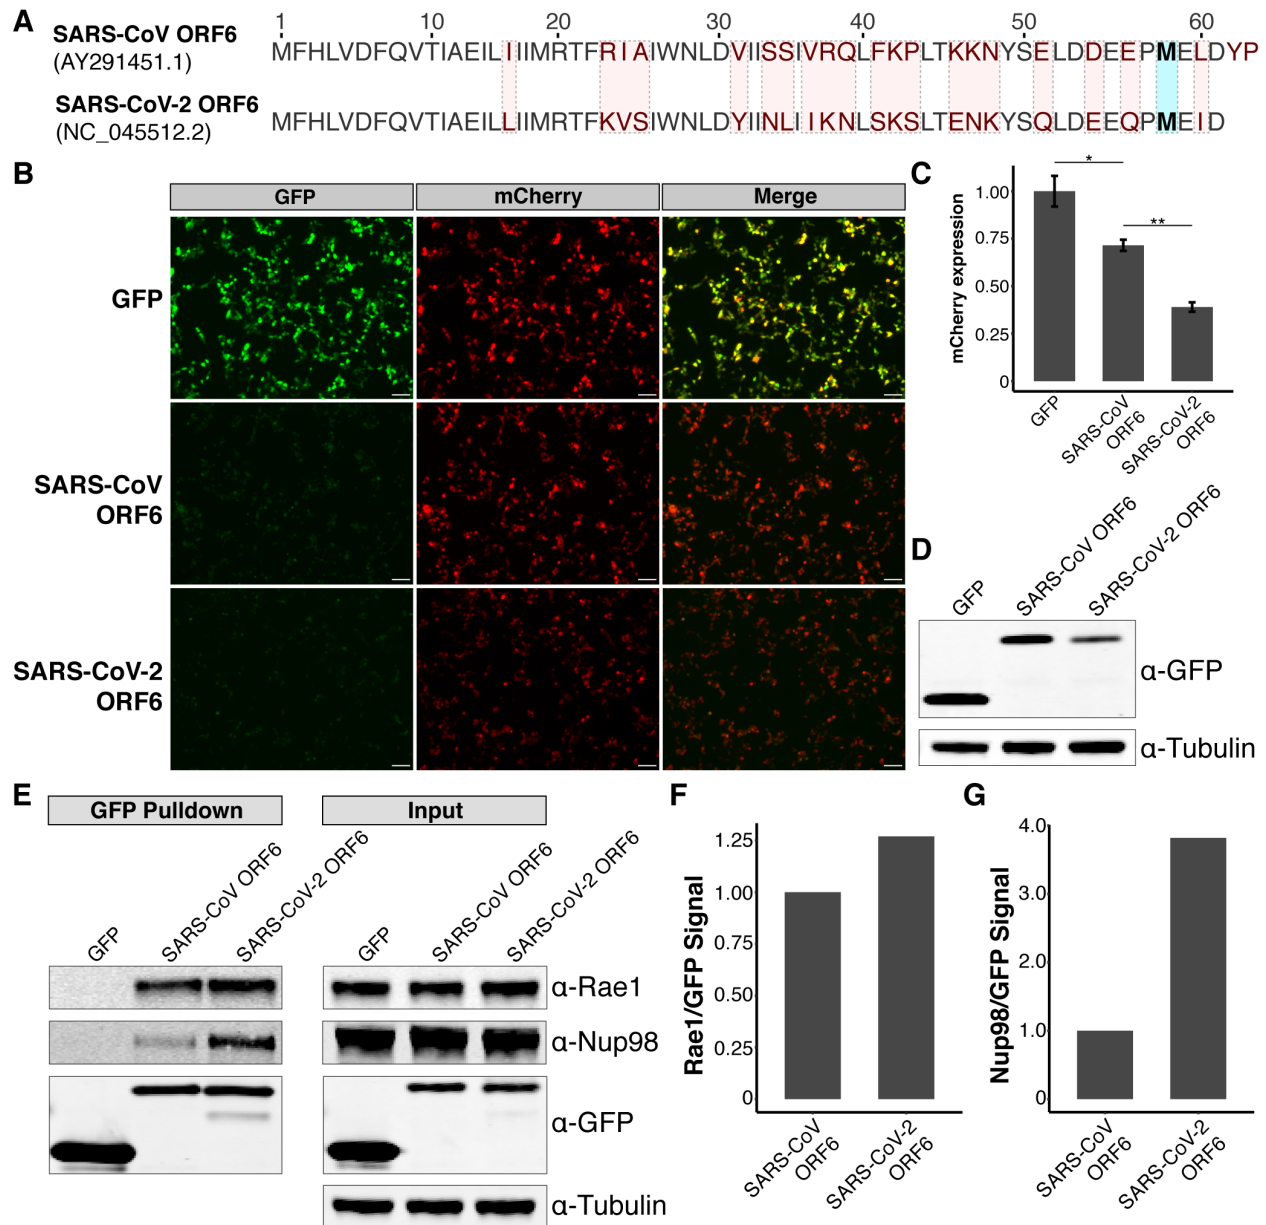

**Figure 6.** SARS-CoV-2 ORF6 represses reporter expression and copurifies with relatively more Rae1-Nup98 than SARS-CoV ORF6. A) Comparison between the amino acid sequences of ORF6 of SARS-CoV and ORF6 of SARS-CoV-2. Residues differing between the two viruses are highlighted in red. The residue (Met58) implicated in binding the Rae1•Nup98 complex is highlighted in blue. B) 293T were transiently transfected with GFP-tagged constructs and mCherry and visualized 24 hours after transfection. Cells transfected with SARS-CoV-2 ORF6 showed C) significantly reduced mCherry expression compared to those transfected with SARS-CoV ORF6. D) Western blotting showed decreased expression of SARS-CoV-2 ORF6 compared to SARS-CoV ORF6 in 293T cells. E) Affinity purification of GFP-tagged constructs demonstrates both ORF6 of SARS-CoV and ORF6 of SARS-CoV-2 interact with Rae1 and Nup98. Densitometry shows SARS-CoV-2 ORF6 copurifies with relatively more F) Rae1 and G) Nup98 compared SARS-CoV ORF6. \*  $p < 0.05$ ; \*\*  $p < 0.01$ . Scale bar: 100  $\mu$ m.
